# Supplementary material
Source: PubMed Central journal article supplement (PMC6645732)
Supplement: ao7b01549_si_001.pdf [file ao7b01549_si_001.pdf]

## Supporting Information

# **Small Naked Pt Nanoparticles Confined in Mesoporous Shell of Hollow Carbon Spheres for High-Performance Nonenzymatic Sensing of H<sub>2</sub>O<sub>2</sub> and Glucose**

Chunmei Zhang,<sup>†,‡</sup> Ruizhong Zhang,<sup>†,‡</sup> Xiaohui Gao,<sup>†,‡</sup> Chunfeng Cheng,<sup>†,‡</sup> Lin Hou,

<sup>†,§</sup> Xiaokun Li<sup>†</sup> and Wei Chen<sup>\*†</sup>

<sup>†</sup>*State Key Laboratory of Electroanalytical Chemistry, Changchun Institute of Applied Chemistry, Chinese Academy of Sciences, 5625 Renmin Street, Changchun 130022, Jilin, China*

<sup>‡</sup>*School of Chemistry and Chemical Engineering, University of Chinese Academy of Sciences, No.19(A) Yuquan road, Shijingshan District, Beijing 100039, China*

<sup>§</sup>*College of Chemistry & Materials Science, Northwest University, 1 Xuefu Avenue, Guodu Education and Hi-Tech Industries Zone, Chang'an District, Xi'an 710069, China*

\*Corresponding author, E-mail: [weichen@ciac.ac.cn](mailto:weichen@ciac.ac.cn)

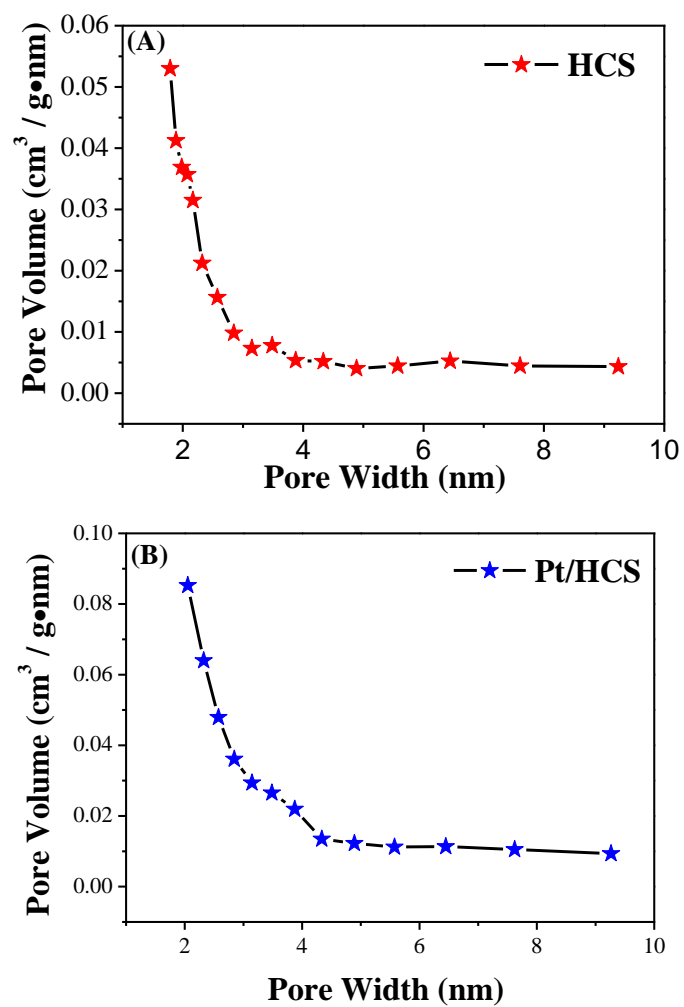

Figure S1 Pore size distributions of HCS (A) and Pt/HCS (B).

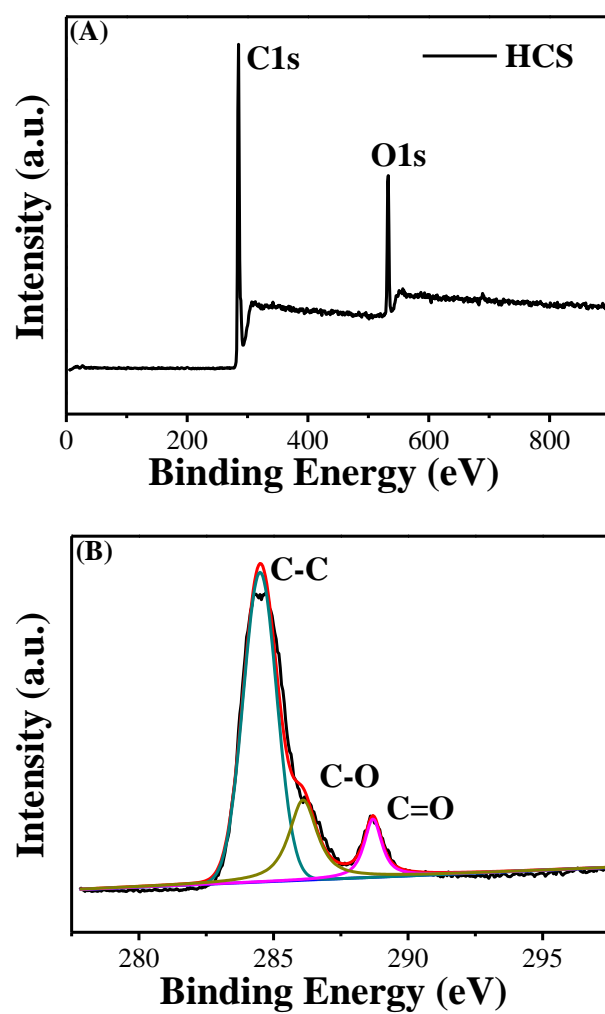

**Figure S2** (A) XPS survey spectrum and (B) high-resolution C 1s XPS spectrum of HCS.

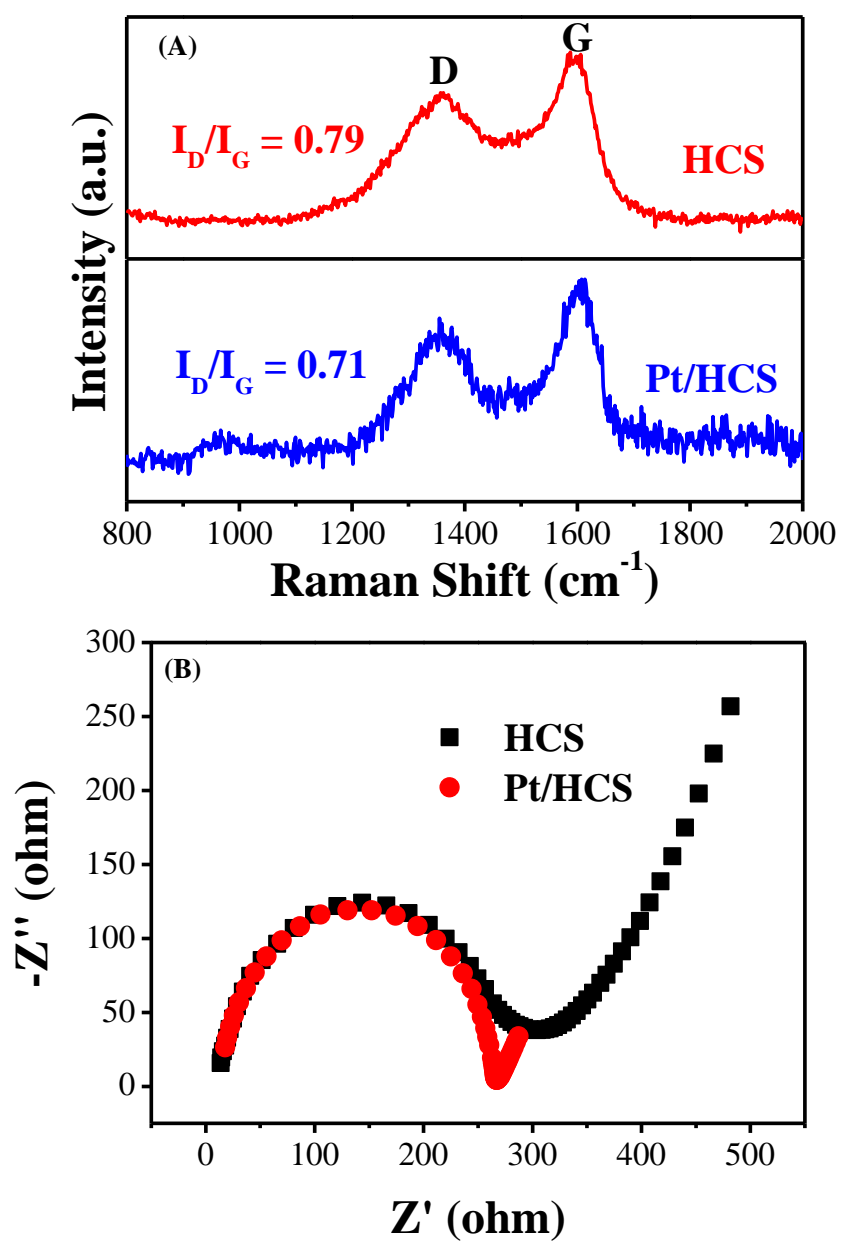

**Figure S3** (A) Raman spectra of HCS (red line) and Pt/HCS (blue line). (B) Electrochemical impedance plots (Nyquist plots) of HCS and Pt/HCS in 0.1 M PBS (pH =7.4) buffer solution.

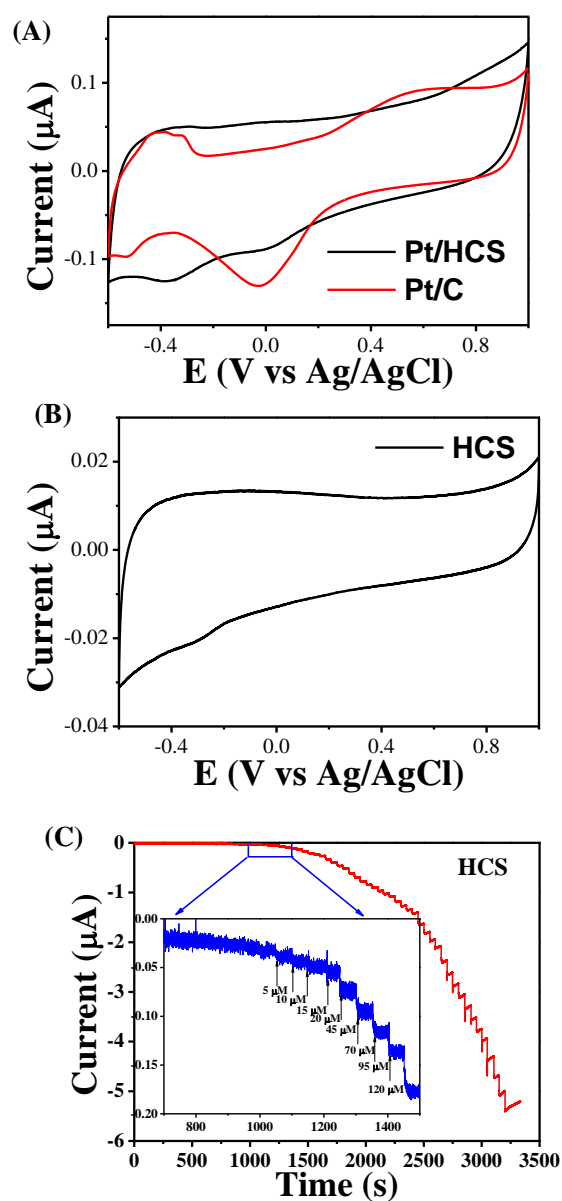

**Figure S4** CV curves of Pt/HCS and Pt/C (A), HCS (B) in 0.1 M N<sub>2</sub>-saturated PBS (pH = 7.4) solution with a scan rate of 50 mV s<sup>-1</sup>. (C) Amperometric response of HCS-modified GCE to successive addition of H<sub>2</sub>O<sub>2</sub> at the potential of -0.1 V in 0.1 M PBS (pH = 7.4) solution. The inset shows the amplified current signal at low concentrations of H<sub>2</sub>O<sub>2</sub>.

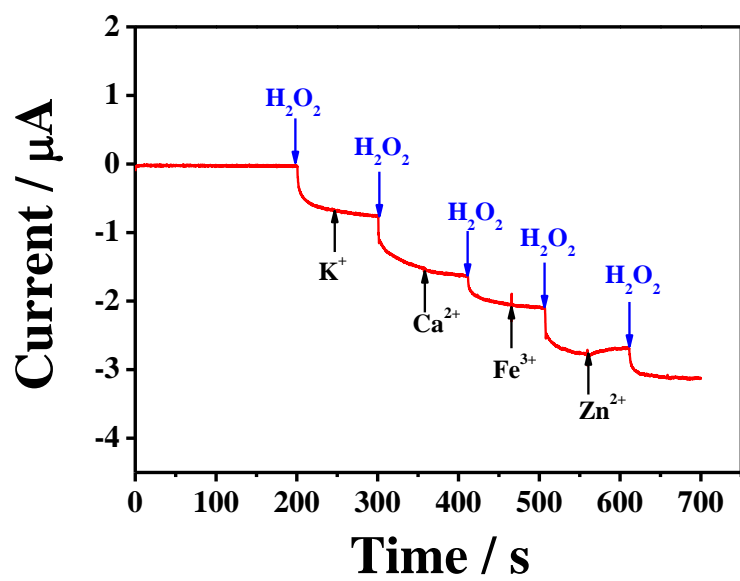

**Figure S5** Current responses of Pt/HCS to the addition of 0.1 M  $\text{H}_2\text{O}_2$  and 0.1 M  $\text{K}^+$ ,  $\text{Ca}^{2+}$ ,  $\text{Fe}^{3+}$  and  $\text{Zn}^{2+}$  in 0.1 M  $\text{N}_2$ -saturated PBS solution.

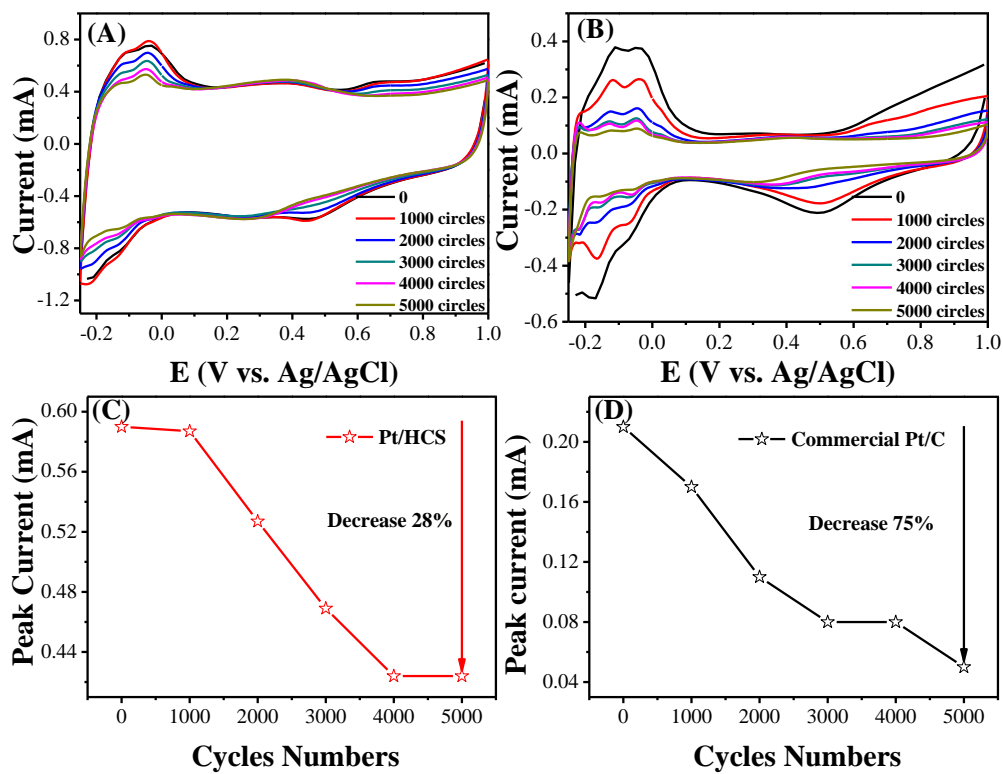

**Figure S6** CV curves after 0, 1000, 2000, 3000, 4000 and 5000 cycles of (A) Pt/HCS and (B) commercial Pt/C in 0.1 M HClO<sub>4</sub> with the scan rate of 100 mV s<sup>-1</sup>. The variations of peak currents after different potential scanning cycles on (C) Pt/HCS and (D) commercial Pt/C.
